# Supplementary material
Source: Springer Nature journal article supplement (https://www.springermedizin.de/resource/supplementary/13099_2014_154_MOESM5_ESM.pdf/9665662)

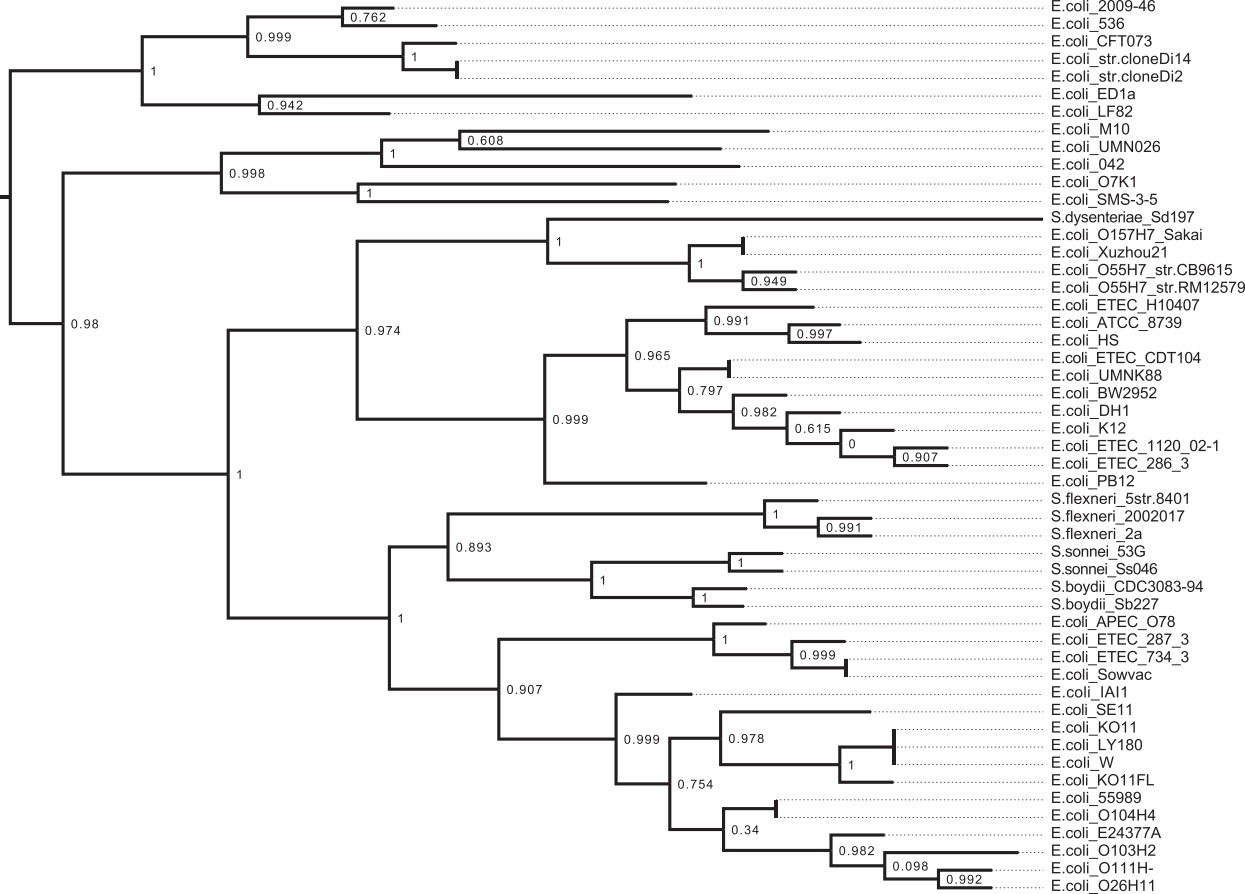

Supplement: MOESM5 [file 9665662]
